# Supplementary material for: Nonadiabatic quantum dynamics explores non-monotonic photodissociation branching of N2 into the N(4S) + N(2D) and N(4S) + N(2P) product channels
Source: Royal Society of Chemistry journal article supplement (doi:10.1039/d3cp04854c), 2024-01-01
Supplement: d3cp04854c1.pdf [file d3cp04854c1.pdf]

## Supplementary Information for

### Nonadiabatic quantum dynamics explores non-monotonic photodissociation branching of N<sub>2</sub> into the N(<sup>4</sup>S)+N(<sup>2</sup>D) and N(<sup>4</sup>S)+N(<sup>2</sup>P) product channels

Natalia Gelfand,<sup>1\*</sup> Ksenia Komarova,<sup>1</sup> Francoise Remacle,<sup>1,2</sup> and Raphael D. Levine<sup>1,3,4</sup>

<sup>1</sup> The Fritz Haber Center for Molecular Dynamics, Institute of Chemistry, The Hebrew University of Jerusalem, Jerusalem 91904, Israel

<sup>2</sup> Theoretical Physical Chemistry, UR MolSys B6c, University of Liège, B4000 Liège, Belgium

<sup>3</sup> Department of Molecular and Medical Pharmacology, David Geffen School of Medicine and

<sup>4</sup> Department of Chemistry and Biochemistry, University of California, Los Angeles, CA 90095, USA

\*natalia.gelfand@mail.huji.ac.il

Figures S1 to S7 provide details of key potential energy curves, their nonadiabatic couplings and their spin-orbit couplings.

|                                                                   |                                          |                                          |                             |                                          |                                          |                             |                             |                                          |                                          |                             |                             |                             |                                                                 |
|-------------------------------------------------------------------|------------------------------------------|------------------------------------------|-----------------------------|------------------------------------------|------------------------------------------|-----------------------------|-----------------------------|------------------------------------------|------------------------------------------|-----------------------------|-----------------------------|-----------------------------|-----------------------------------------------------------------|
|                                                                   | <sup>1</sup> Σ <sub>u</sub> <sup>+</sup> | --                                       | --                          | --                                       | --                                       | --                          | --                          | --                                       | --                                       | --                          | --                          | --                          | <sup>1</sup> Σ <sub>u</sub> <sup>-</sup> (m <sub>S</sub> =0)    |
| <sup>1</sup> Σ <sub>u</sub> <sup>+</sup> (m <sub>S</sub> =0)      | --                                       | <sup>1</sup> Σ <sub>u</sub> <sup>-</sup> | --                          | --                                       | --                                       | --                          | --                          | --                                       | --                                       | --                          | --                          | --                          | <sup>1</sup> Δ <sub>u</sub> (m <sub>S</sub> =0)                 |
| <sup>1</sup> Σ <sub>u</sub> <sup>-</sup> (m <sub>S</sub> =0)      | --                                       | --                                       | <sup>1</sup> Δ <sub>u</sub> | --                                       | LSZ                                      | LSX/Y                       | --                          | --                                       | LSZ                                      | LSX/Y                       | --                          | LSX/Y                       | <sup>3</sup> Σ <sub>u</sub> <sup>+</sup> (m <sub>S</sub> =+/-1) |
| <sup>1</sup> Δ <sub>u</sub> (m <sub>S</sub> =0)                   | --                                       | --                                       | --                          | <sup>3</sup> Σ <sub>u</sub> <sup>+</sup> | --                                       | LSX/Y                       | --                          | LSZ                                      | --                                       | LSX/Y                       | --                          | LSX/Y                       | <sup>3</sup> Σ <sub>u</sub> <sup>-</sup> (m <sub>S</sub> =+/-1) |
| <sup>3</sup> Σ <sub>u</sub> <sup>+</sup> (m <sub>S</sub> =0)      | --                                       | LSZ                                      | --                          | --                                       | <sup>3</sup> Σ <sub>u</sub> <sup>-</sup> | --                          | LSX/Y                       | LSX/Y                                    | LSX/Y                                    | LSZ                         | LSX/Y                       | LSZ                         | <sup>3</sup> Π <sub>u</sub> (m <sub>S</sub> =0)                 |
| <sup>3</sup> Σ <sub>u</sub> <sup>-</sup> (m <sub>S</sub> =0)      | LSZ                                      | --                                       | --                          | --                                       | --                                       | <sup>3</sup> Π <sub>u</sub> | LSZ                         | --                                       | --                                       | LSX/Y                       | LSZ                         | LSX/Y                       | <sup>3</sup> Δ <sub>u</sub> (m <sub>S</sub> =+/-1)              |
| <sup>3</sup> Π <sub>u</sub> (m <sub>S</sub> =+/-1)                | LSX/Y                                    | LSX/Y                                    | LSX/Y                       | LSX/Y                                    | LSX/Y                                    | LSZ                         | <sup>3</sup> Δ <sub>u</sub> | --                                       | LSZ                                      | LSX/Y                       | --                          | --                          | <sup>5</sup> Σ <sub>u</sub> <sup>+</sup> (m <sub>S</sub> =+/-1) |
| <sup>3</sup> Δ <sub>u</sub> (m <sub>S</sub> =0)                   | --                                       | --                                       | LSZ                         | --                                       | --                                       | LSX/Y                       | --                          | <sup>5</sup> Σ <sub>u</sub> <sup>+</sup> | --                                       | LSX/Y                       | --                          | --                          | <sup>5</sup> Σ <sub>u</sub> <sup>-</sup> (m <sub>S</sub> =+/-1) |
| <sup>5</sup> Σ <sub>u</sub> <sup>+</sup> (m <sub>S</sub> =0,+/-2) | --                                       | --                                       | --                          | --                                       | LSZ                                      | LSX/Y                       | --                          | --                                       | <sup>5</sup> Σ <sub>u</sub> <sup>-</sup> | LSZ                         | LSX/Y                       | --                          | <sup>5</sup> Π <sub>u</sub> (m <sub>S</sub> =0,+/-2)            |
| <sup>5</sup> Σ <sub>u</sub> <sup>-</sup> (m <sub>S</sub> =0,+/-2) | --                                       | --                                       | --                          | LSZ                                      | --                                       | LSX/Y                       | --                          | LSZ                                      | --                                       | <sup>5</sup> Π <sub>u</sub> | LSZ                         | --                          | <sup>5</sup> Δ <sub>u</sub> (m <sub>S</sub> =+/-1)              |
| <sup>5</sup> Π <sub>u</sub> (m <sub>S</sub> =+/-1)                | --                                       | --                                       | --                          | LSX/Y                                    | LSX/Y                                    | LSZ                         | LSX/Y                       | LSX/Y                                    | LSX/Y                                    | LSZ                         | <sup>5</sup> Δ <sub>u</sub> | --                          | <sup>1</sup> Π <sub>u</sub> (m <sub>S</sub> =0)                 |
| <sup>5</sup> Δ <sub>u</sub> (m <sub>S</sub> =0,+/-2)              | --                                       | --                                       | --                          | --                                       | --                                       | LSX/Y                       | LSZ                         | --                                       | --                                       | LSX/Y                       | LSZ                         | <sup>1</sup> Π <sub>u</sub> |                                                                 |

Fig. S1. Schematical representation of spin-orbit couplings between the electronic accounting for their magnetic,  $m_S$ , quantum number (in parenthesis). LSX/Y and LSZ are the Cartesian components of the spin-orbit coupling in the molecular frame. Depending on the symmetry of the optically excited singlets, <sup>1</sup>Σ<sub>u</sub><sup>+</sup> or <sup>1</sup>Π<sub>u</sub>, two sets of couplings are considered: for <sup>1</sup>Σ<sub>u</sub><sup>+</sup> at the bottom left corner (in red) and for <sup>1</sup>Π<sub>u</sub> at the top right corner (in blue).

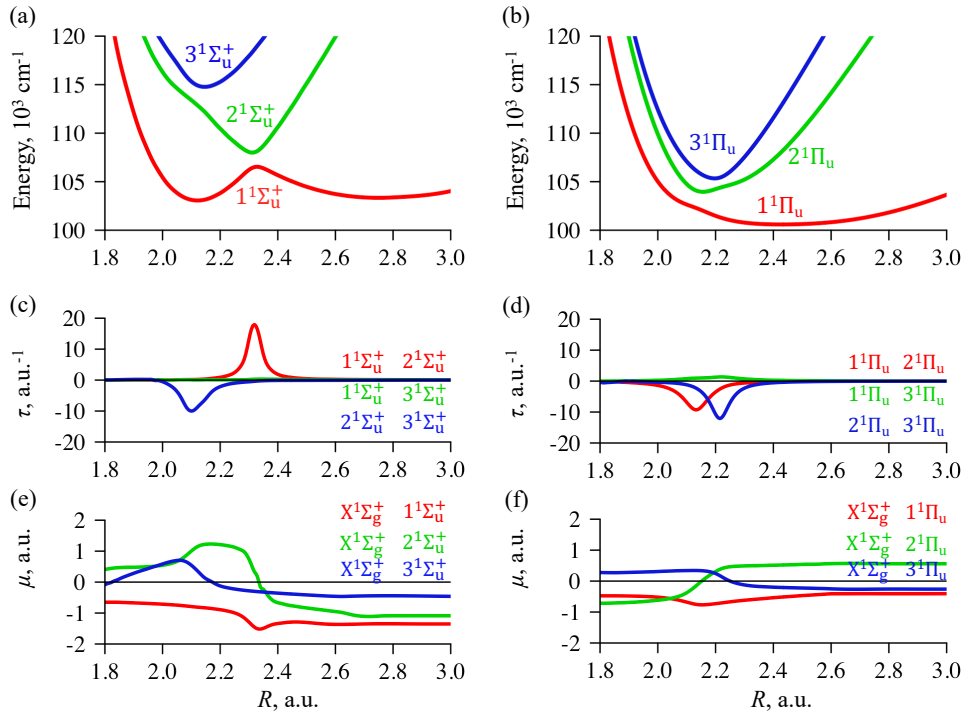

Fig. S2. Potential energy curves of the three lowest  $1^1\Sigma_u^+$  and  $1^1\Pi_u$  electronic states that are one-photon accessible from the ground state (a and b), respective  $X^1\Sigma_g^+ - 1^1\Sigma_u^+$  and  $X^1\Sigma_g^+ - 1^1\Pi_u$  electronic transition dipole moments (c and d) and their nonadiabatic couplings (e and f) as a function of the internuclear distance,  $R$ .

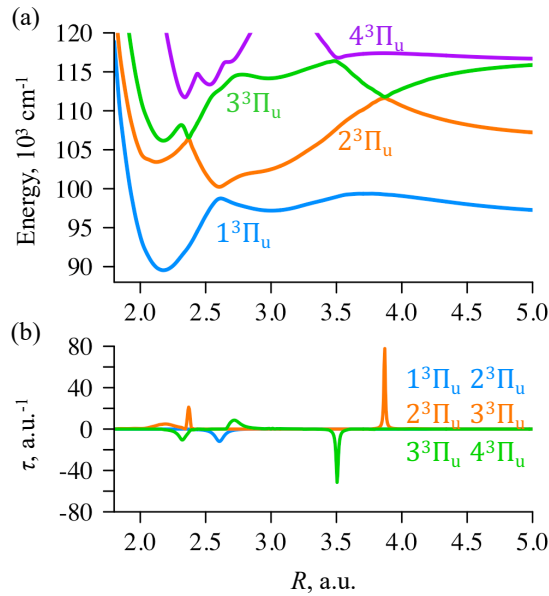

Fig. S3. Potential energy curves of the four lowest  $3^3\Pi_u$  electronic states (a) and their quite strong non-adiabatic couplings (b) as a function of the internuclear distance,  $R$ .

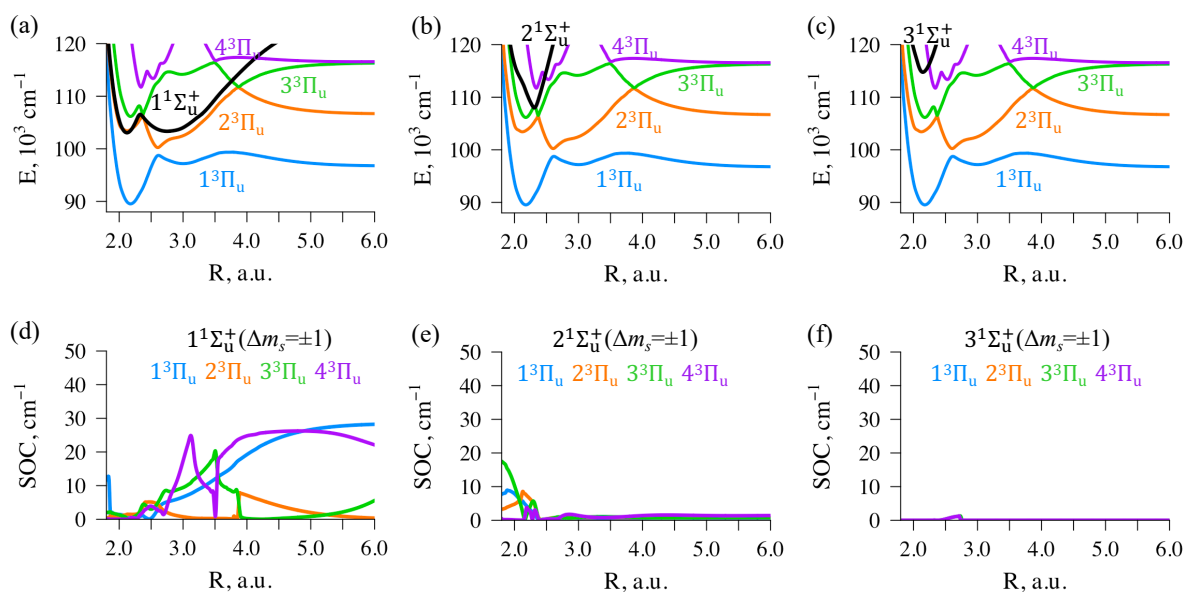

Fig. S4. Potential energy curves (a-c) and LSX/LSY spin-orbit coupling elements (d-f) between  $1^1\Sigma_u^+$  ( $m_s=0$ ) and  $3^3\Pi_u$  ( $m_s=1$ ) (a, d),  $2^1\Sigma_u^+$  ( $m_s=0$ ) and  $3^3\Pi_u$  ( $m_s=1$ ) (b, e),  $3^1\Sigma_u^+$  ( $m_s=0$ ) and  $3^3\Pi_u$  ( $m_s=1$ ) (c, f) electronic states.

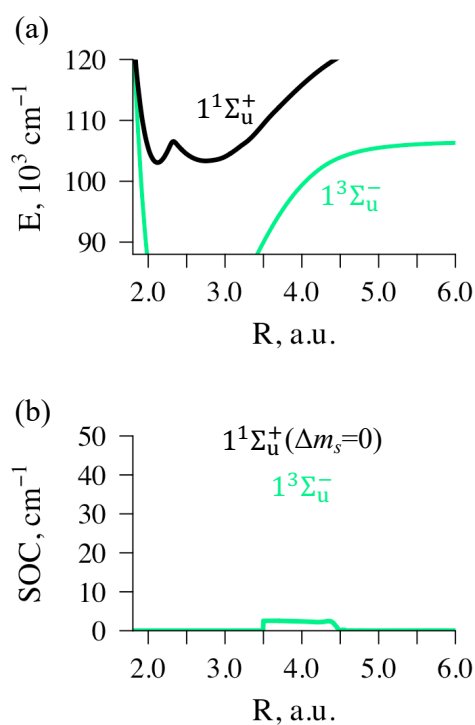

Fig. S5. Potential energy curves (a) and spin-orbit coupling elements (b) between electronic  $1^1\Sigma_u^+$  ( $m_s=0$ ) and  $1^3\Sigma_u^-$  ( $m_s=0$ ) (LSZ component).

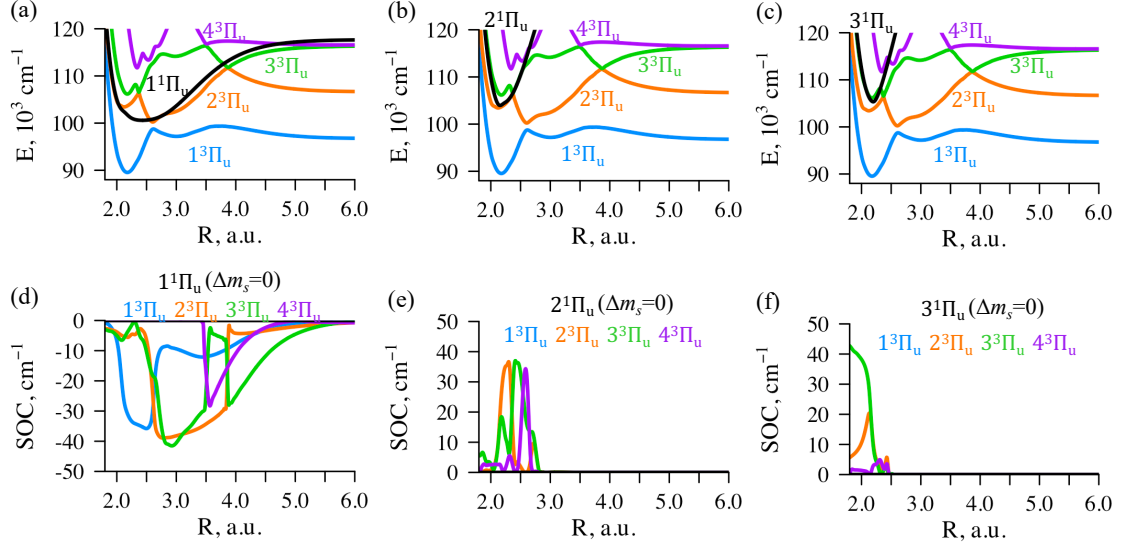

Fig. S6. Potential energy curves (a-c) and LSZ spin-orbit coupling elements (d-f) between  $1^1\Pi_u$  ( $m_s=0$ ) and  $3^3\Pi_u$  ( $m_s=0$ ) (a, d),  $2^1\Pi_u$  ( $m_s=0$ ) and  $3^3\Pi_u$  ( $m_s=0$ ) (b, e),  $3^1\Pi_u$  ( $m_s=0$ ) and  $3^3\Pi_u$  ( $m_s=0$ ) (c, f) electronic states.

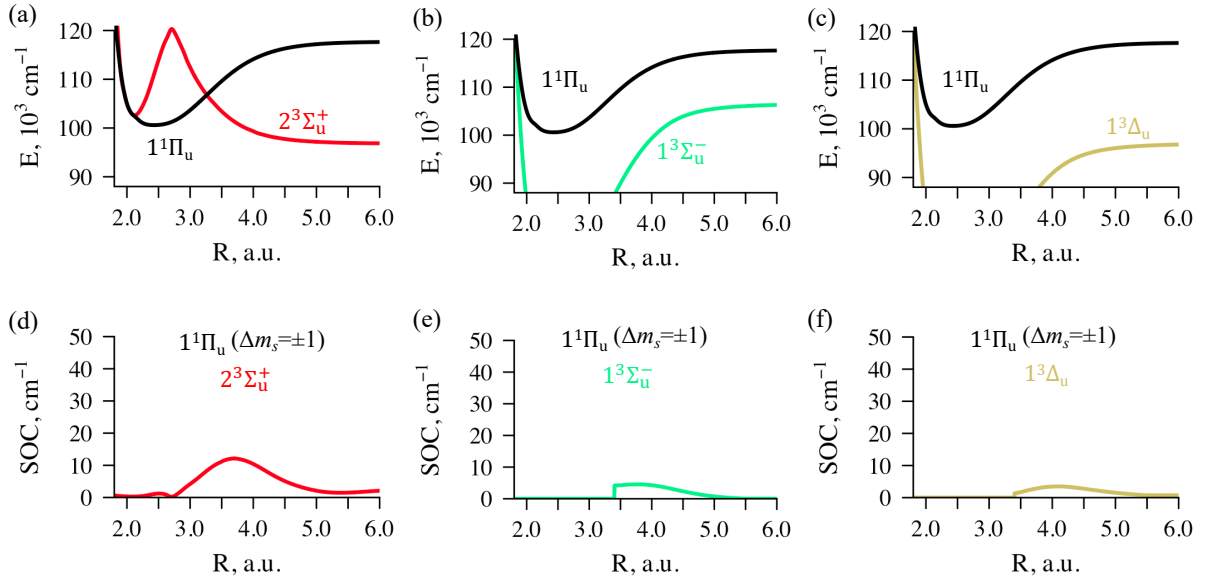

Fig. S7. Potential energy curves (a-c) and spin-orbit LSX/LSY coupling elements (d-f) between different electronic states:  $1^1\Pi_u$  ( $m_s=0$ ) and  $2^3\Sigma_u^+$  ( $m_s=0$ ),  $1^3\Sigma_u^-$  ( $m_s=0$ ),  $1^3\Delta_u$  ( $m_s=0$ ).
